# Supplementary material for: H-Bonding and C–H⋯π assisted mechanofluorochromism of triphenylamine-containing vinylheterocycles bearing cyano and methyl groups
Source: Royal Society of Chemistry journal article supplement (doi:10.1039/c8nj03510e), 2018-01-01
Supplement: c8nj03510e1.pdf [file c8nj03510e1.pdf]

## Supporting Information for

# H-bonding and C-H $\cdots\pi$ assisted mechanofluorochromism of triphenylamine-containing vinylheterocycles bearing cyano and methyl

Jiang Peng,<sup>‡[a]</sup> Jinyu Zhao,<sup>‡[a]</sup> Longde Zheng,<sup>[a]</sup> Kaiqi Ye,<sup>[a]</sup> Jingbo Sun,<sup>[a]</sup> Ran Lu\*<sup>[a]</sup>

<sup>a</sup>State Key Laboratory of Supramolecular Structure and Materials, College of Chemistry, Jilin University, Changchun 130012, P. R. China

E-mail: luran@mail.jlu.edu.cn

**Table S1** Photophysical data of the synthesized compounds in solutions.

| Compound     | Solvents    | $\lambda_{\text{abs}}^{\text{a}}$ | $\lambda_{\text{em}}^{\text{b}}$ | $\Delta\nu_{\text{st}}/(\text{cm}^{-1})^{\text{c}}$ | $\Phi_{\text{F}}^{\text{d}}$ |
|--------------|-------------|-----------------------------------|----------------------------------|-----------------------------------------------------|------------------------------|
| <b>BIT</b>   | Cyclohexane | 302, 381                          | 426, 443                         | 2773                                                | 0.51                         |
|              | Toluene     | 306, 387                          | 444                              | 3317                                                | 0.52                         |
|              | THF         | 305, 383                          | 454                              | 4083                                                | 0.56                         |
|              | Chloroform  | 305, 385                          | 472                              | 4788                                                | 0.26                         |
|              | DMF         | 304, 388                          | 490                              | 5365                                                | 0.55                         |
| <b>BITM</b>  | Cyclohexane | 302, 388                          | 433, 454                         | 2679                                                | 0.66                         |
|              | Toluene     | 305, 393                          | 454                              | 3419                                                | 0.57                         |
|              | THF         | 304, 389                          | 473                              | 4565                                                | 0.66                         |
|              | Chloroform  | 303, 396                          | 496                              | 5091                                                | 0.34                         |
|              | DMF         | 305, 390                          | 501                              | 5681                                                | 0.71                         |
| <b>BICT</b>  | Cyclohexane | 302, 434                          | 483, 511                         | 2338                                                | -                            |
|              | Toluene     | 304, 439                          | 513                              | 3210                                                | -                            |
|              | THF         | 298, 427                          | 529                              | 4516                                                | -                            |
|              | Chloroform  | 299, 445                          | 543                              | 4056                                                | -                            |
|              | DMF         | 297, 422                          | 575                              | 6305                                                | -                            |
| <b>BICTM</b> | Cyclohexane | 301, 443                          | 499                              | 2533                                                | -                            |
|              | Toluene     | 301, 446                          | 533                              | 3589                                                | -                            |
|              | THF         | 297, 434                          | 555                              | 5023                                                | -                            |
|              | Chloroform  | 298, 453                          | 581                              | 4863                                                | -                            |
|              | DMF         | 297, 436                          | 601                              | 6297                                                | -                            |
| <b>BOTM</b>  | Cyclohexane | 302, 402                          | 447, 467                         | 2504                                                | 0.34                         |
|              | Toluene     | 303, 406                          | 479                              | 3753                                                | 0.49                         |
|              | THF         | 302, 404                          | 511                              | 5183                                                | 0.46                         |
|              | Chloroform  | 303, 409                          | 521                              | 5256                                                | 0.31                         |
|              | DMF         | 302, 405                          | 559                              | 6802                                                | 0.17                         |
| <b>BTTM</b>  | Cyclohexane | 302, 408                          | 453, 475                         | 2434                                                | 0.34                         |
|              | Toluene     | 302, 412                          | 485                              | 3653                                                | 0.38                         |
|              | THF         | 301, 411                          | 521                              | 5137                                                | 0.32                         |
|              | Chloroform  | 303, 415                          | 529                              | 5193                                                | 0.26                         |
|              | DMF         | 303, 413                          | 567                              | 6576                                                | 0.20                         |
| <b>BTCT</b>  | Cyclohexane | 295, 444                          | 491                              | 2156                                                | -                            |
|              | Toluene     | 298, 451                          | 530                              | 3305                                                | -                            |
|              | THF         | 293, 448                          | 553                              | 4238                                                | -                            |
|              | Chloroform  | 298, 455                          | 566                              | 4310                                                | -                            |
|              | DMF         | 294, 452                          | 611                              | 5757                                                | -                            |
| <b>BTCTM</b> | Cyclohexane | 296, 454                          | 512                              | 2495                                                | -                            |
|              | Toluene     | 296, 460                          | 554                              | 3689                                                | -                            |
|              | THF         | 294, 457                          | 590                              | 4933                                                | -                            |
|              | Chloroform  | 296, 464                          | 601                              | 4913                                                | -                            |
|              | DMF         | 297, 460                          | 625                              | 5739                                                | -                            |

<sup>a</sup> Measured in solution ( $1 \times 10^{-5}$  M), <sup>b</sup> Excited at 390 nm (**BIT** and **BITM**) and Excited at 430 nm (**BICT** and **BICTM**), Excited at 400 nm (**BOTM** and **BTTM**), Excited at 430 nm (**BTCT** and **BTCTM**), <sup>c</sup> $\Delta\nu_{\text{st}} = \nu_{\text{abs}} - \nu_{\text{em}}$ , <sup>d</sup> The fluorescence quantum yield ( $\Phi_{\text{F}}$ ) was measured using 9,10-diphenylanthracene in toluene (0.1 M) ( $\Phi_{\text{F}} = 0.85$ ) as standard.

**Table S2** Single crystal data of **BICTM**, **BTTM** and **BTCT**.

|                                               | <b>BICTM</b><br><b>(C<sub>2</sub>H<sub>5</sub>OH)</b> | <b>BTTM</b>                                      | <b>BTCT</b>                                                   |
|-----------------------------------------------|-------------------------------------------------------|--------------------------------------------------|---------------------------------------------------------------|
| Formula                                       | C <sub>32</sub> H <sub>30</sub> N <sub>4</sub> O      | C <sub>29</sub> H <sub>24</sub> N <sub>2</sub> S | C <sub>56</sub> H <sub>38</sub> N <sub>6</sub> S <sub>2</sub> |
| Formula weight                                | 486.60                                                | 432.56                                           | 859.04                                                        |
| Space group                                   | P $\bar{1}$                                           | P2(1)/n                                          | P $\bar{1}$                                                   |
| Crystal system                                | Triclinic                                             | Monoclinic                                       | Triclinic                                                     |
| <i>a</i> (Å)                                  | 7.8915(3)                                             | 22.5283(7)                                       | 10.7275(5)                                                    |
| <i>b</i> (Å)                                  | 12.9891(6)                                            | 5.7765(2)                                        | 13.9409(7)                                                    |
| <i>c</i> (Å)                                  | 13.8662(6)                                            | 19.8649(6)                                       | 16.1945(8)                                                    |
| $\alpha$ (deg)                                | 69.849(2)                                             | 90.000                                           | 73.661(2)                                                     |
| $\beta$ (deg)                                 | 89.757(2)                                             | 114.8520(10)                                     | 81.696(2)                                                     |
| $\gamma$ (deg)                                | 87.177(2)                                             | 90.000                                           | 72.068(2)                                                     |
| <i>V</i> (Å <sup>3</sup> )                    | 1332.59(10)                                           | 2345.72(13)                                      | 2206.76(19)                                                   |
| <i>Z</i>                                      | 2                                                     | 4                                                | 2                                                             |
| <i>D</i> <sub>calc</sub> (g/cm <sup>3</sup> ) | 1.213                                                 | 1.225                                            | 1.293                                                         |
| $\mu$ (mm <sup>-1</sup> )                     | 0.075                                                 | 0.157                                            | 0.168                                                         |
| <i>Final R indices</i>                        | R1 = 0.0465                                           | R1 = 0.0499                                      | R1 = 0.0472                                                   |
| <i>[I&gt;2sigma(I)]</i>                       | wR2 = 0.1082                                          | wR2 = 0.1184                                     | wR2 = 0.1132                                                  |
| <i>R indices(all data)</i>                    | R1 = 0.0799                                           | R1 = 0.0834                                      | R1 = 0.0934                                                   |
|                                               | wR2 = 0.1255                                          | wR2 = 0.1347                                     | wR2 = 0.1431                                                  |
| <i>GoF</i>                                    | 1.048                                                 | 1.051                                            | 1.030                                                         |
| CCDC                                          | 1851499                                               | 1851402                                          | 1851401                                                       |

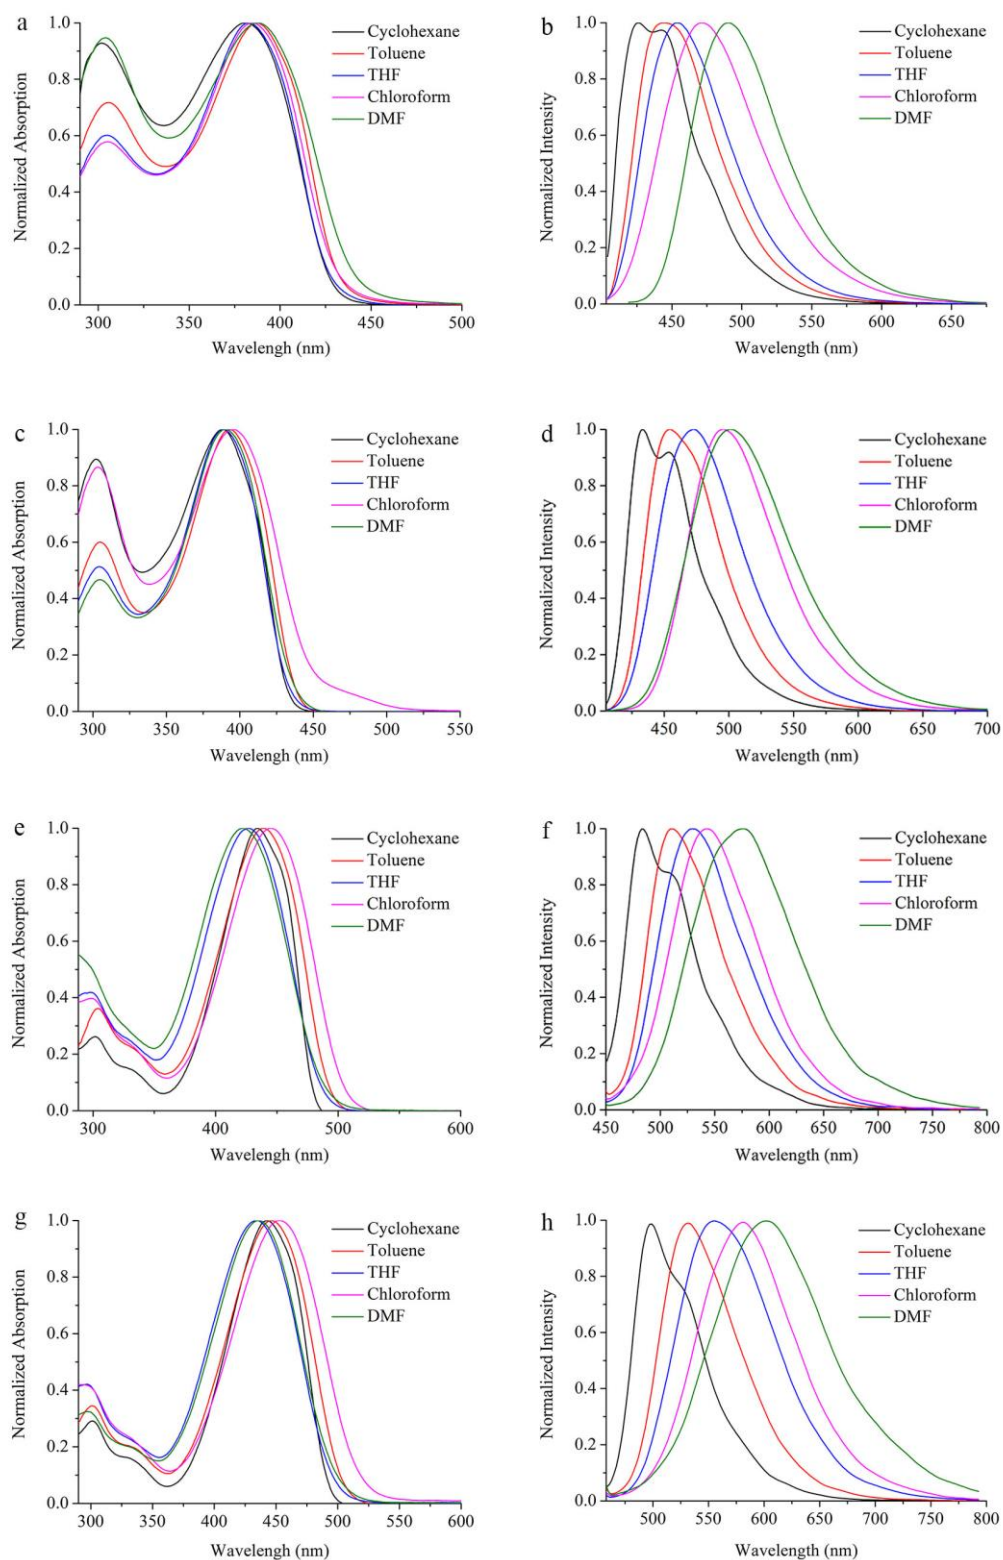

**Figure S1** Normalized UV-vis absorption spectra of **BIT** (a), **BITM** (c), **BICT** (e) and **BICTM** (g) and fluorescence emission spectra of **BIT** (b,  $\lambda_{\text{ex}} = 390$  nm), **BITM** (d,  $\lambda_{\text{ex}} = 390$  nm), **BICT** (f,  $\lambda_{\text{ex}} = 430$  nm), **BICTM** (h,  $\lambda_{\text{ex}} = 430$  nm) in different solvents.

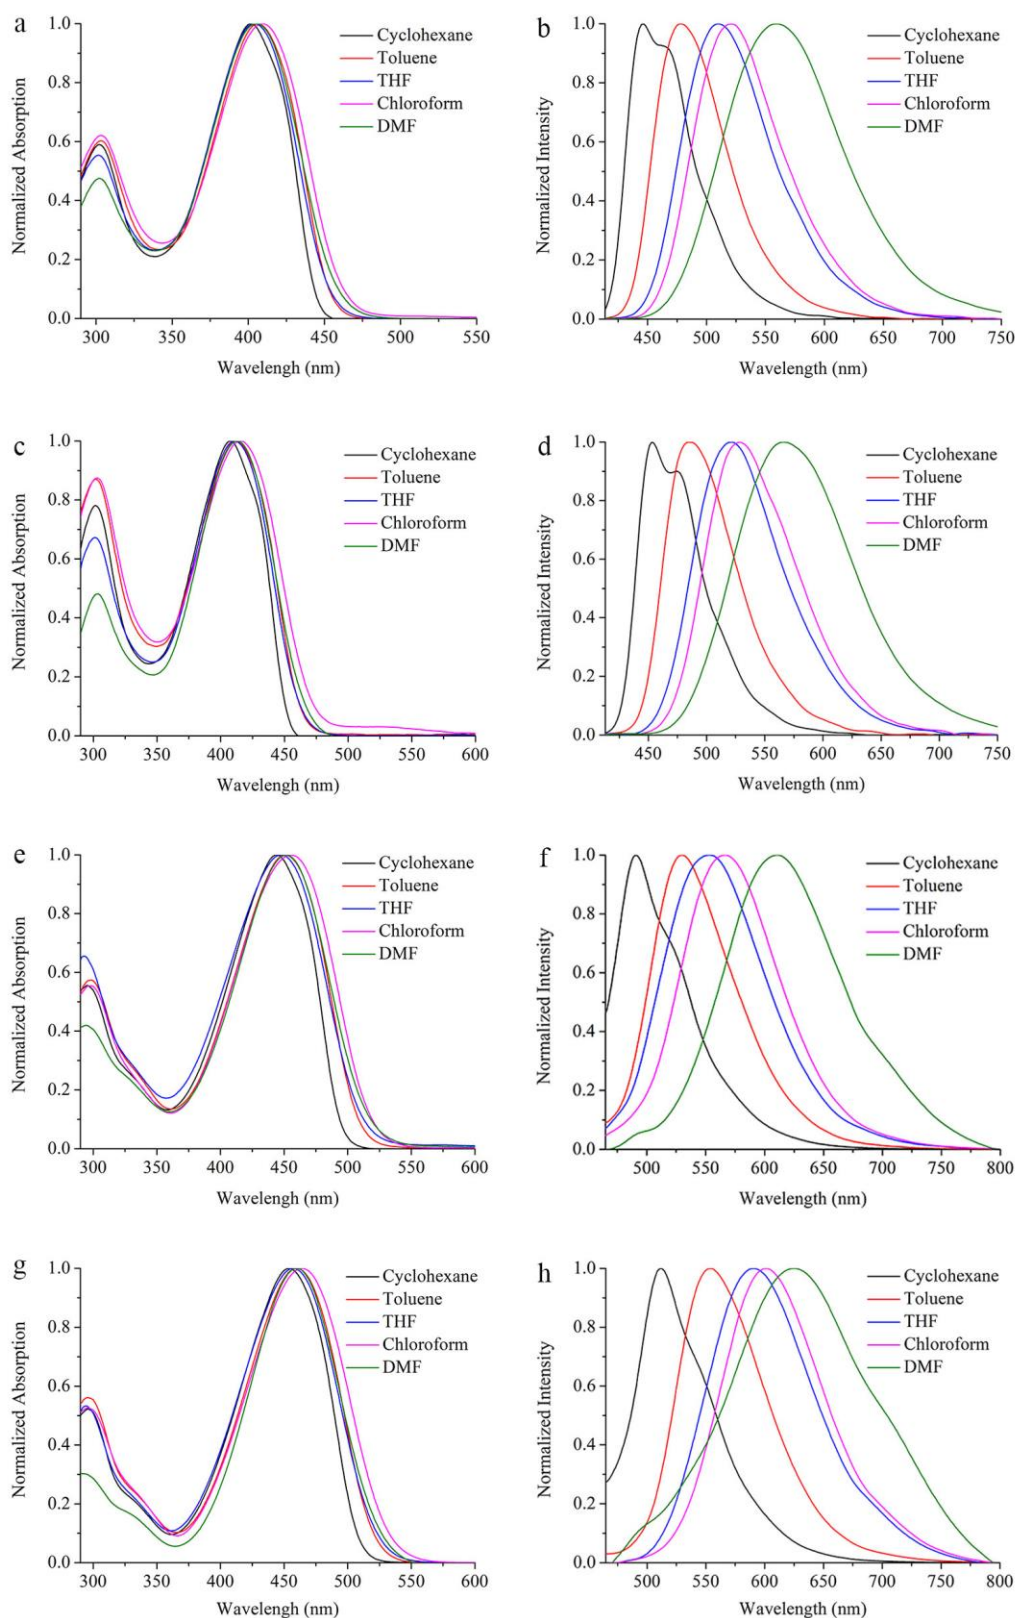

**Figure S2** Normalized UV-vis absorption spectra of **BOTM** (a), **BTTM** (c), **BTCT** (e) and **BTCTM** (g) and fluorescence emission spectra of **BOTM** (b,  $\lambda_{\text{ex}} = 400$  nm), **BTTM** (d,  $\lambda_{\text{ex}} = 400$  nm), **BTCT** (f,  $\lambda_{\text{ex}} = 430$  nm), **BTCTM** (h,  $\lambda_{\text{ex}} = 430$  nm) in different solvents.

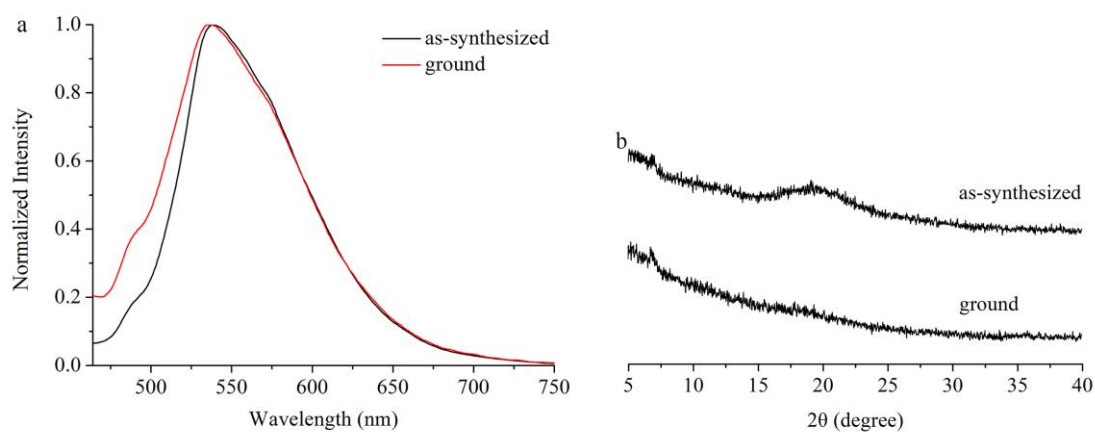

**Figure S3** Normalized fluorescent emission spectra of **BIT** (a,  $\lambda_{\text{ex}} = 390$  nm) and XRD patterns of **BIT** (b) in different solid-state.

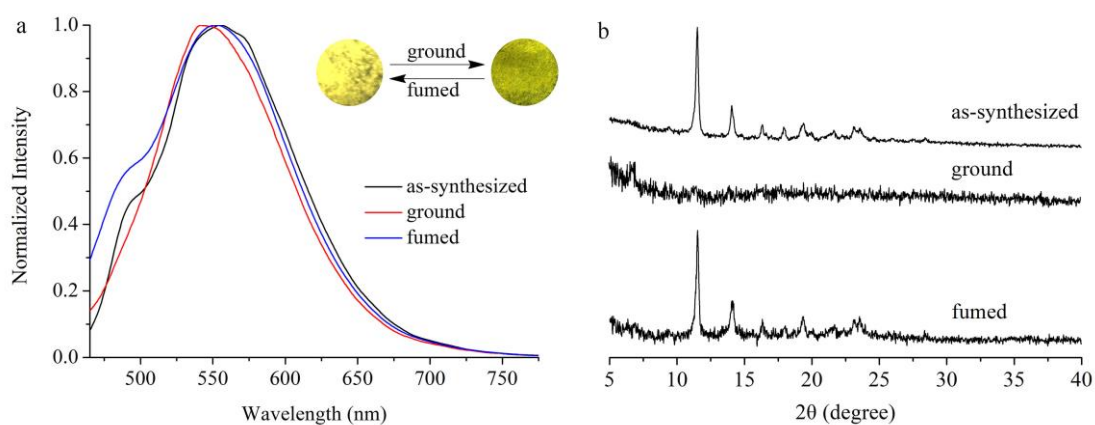

**Figure S4** Normalized fluorescent emission spectra of **BITM** (a) excited at 390 nm and XRD patterns of **BITM** (b) in different solid-state.

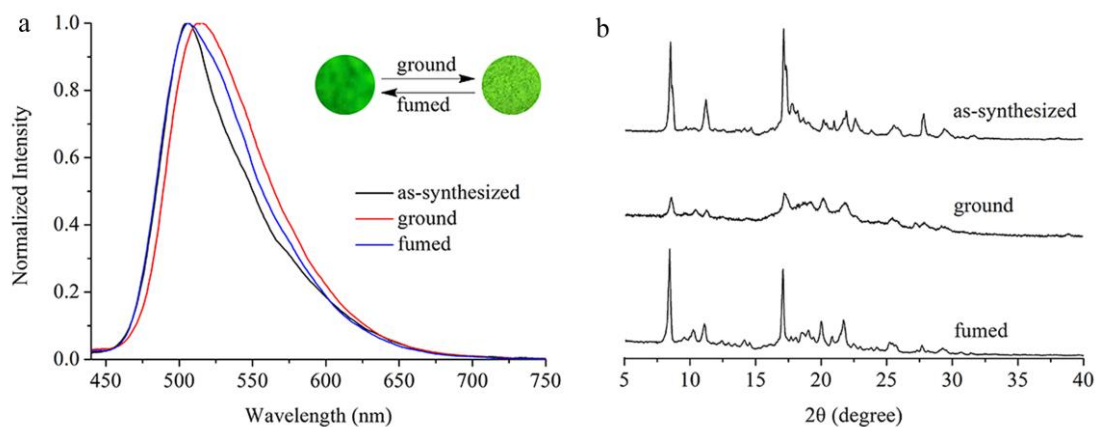

**Figure S5** Normalized fluorescent emission spectra of **BOTM** (a) excited at 400 nm and XRD patterns of **BOTM** (b) in different solid-state.

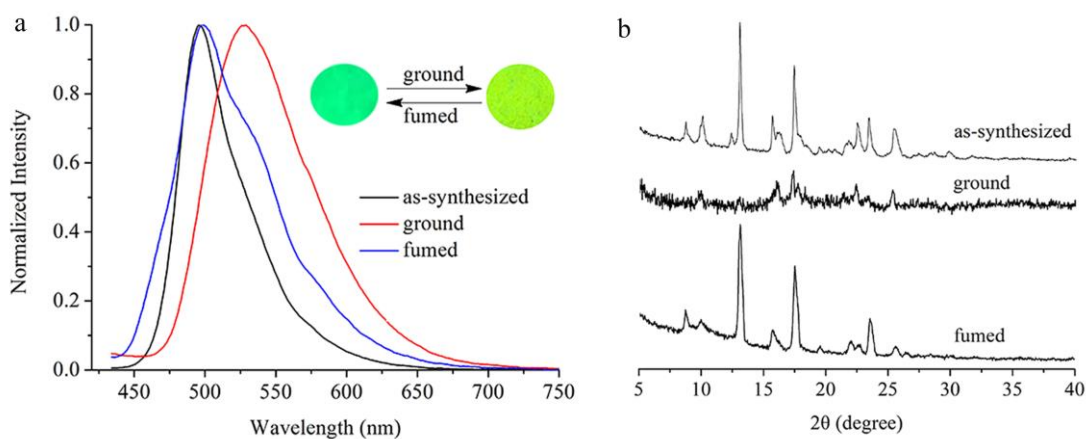

**Figure S6** Normalized fluorescent emission spectra of **BTM** (a) excited at 400 nm and XRD patterns of **BTM** (b) in different solid-state.



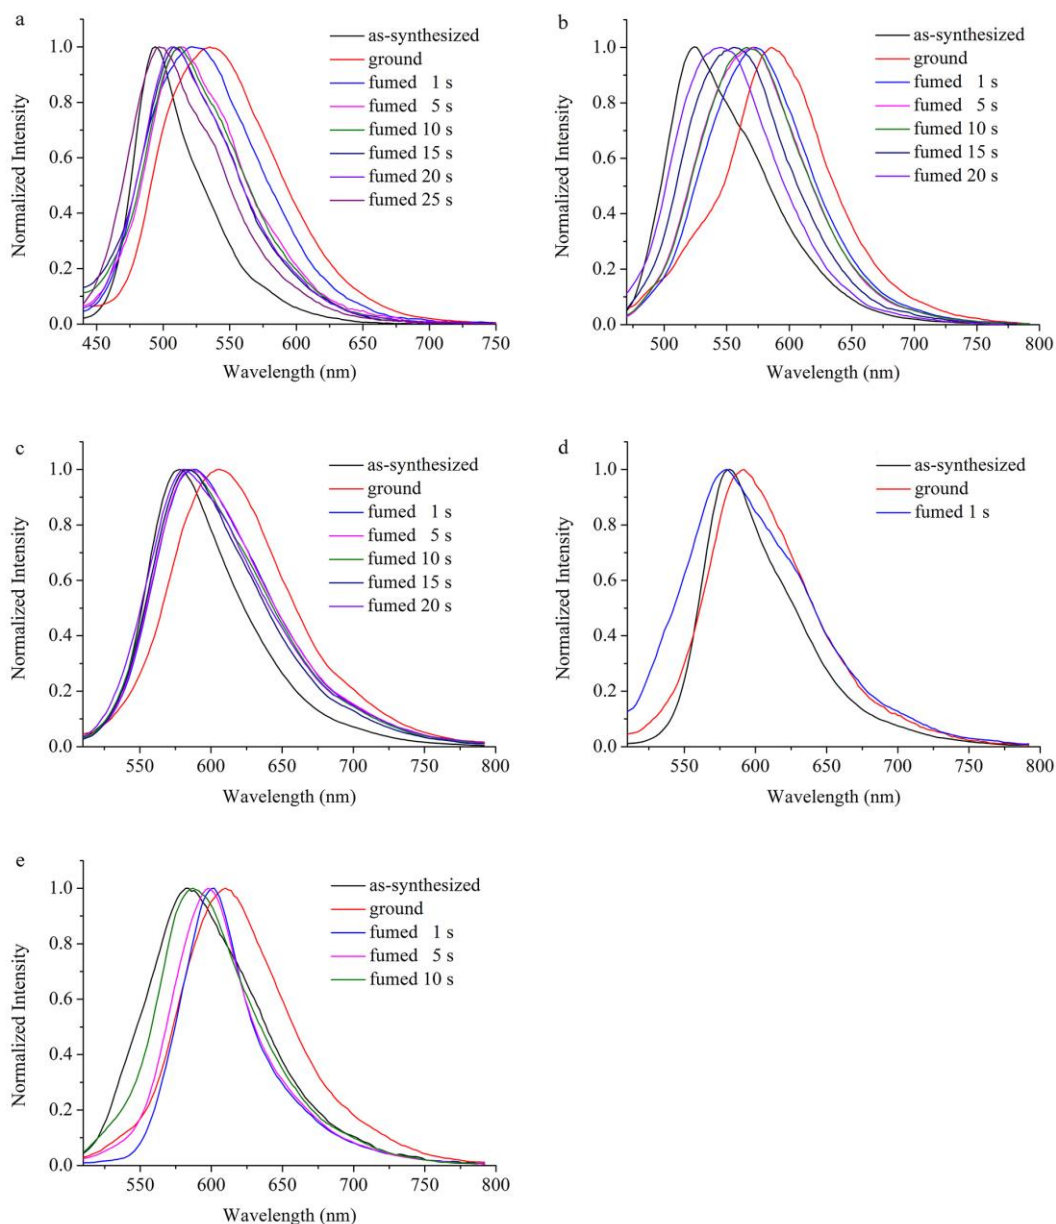

**Figure S7** Fluorescence emission spectra of **BTM** (a,  $\lambda_{\text{ex}} = 400$  nm) and **BICT** (b,  $\lambda_{\text{ex}} = 430$  nm), **BICTM** (c,  $\lambda_{\text{ex}} = 430$  nm), **BTCT** (d,  $\lambda_{\text{ex}} = 430$  nm), **BTCTM** (e,  $\lambda_{\text{ex}} = 430$  nm) in the as-synthesized crystals, in the ground powders and in the fumed samples, which were prepared by fuming the ground powders with DCM for different times.



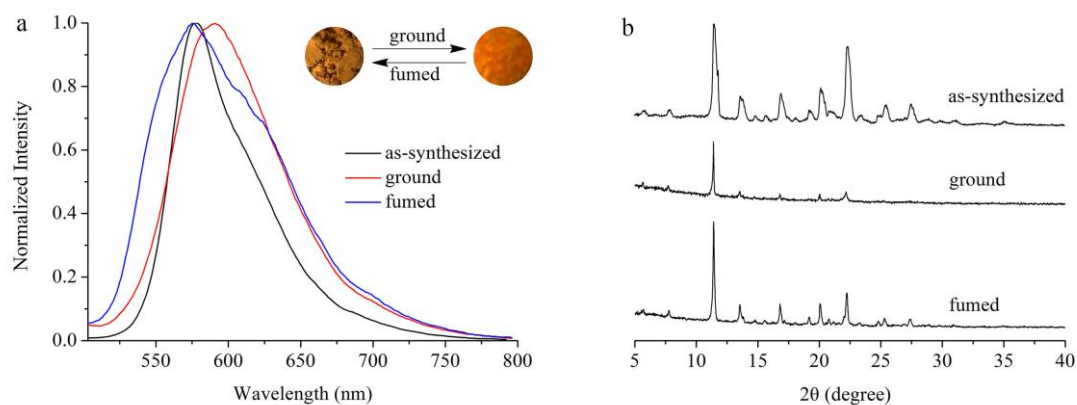

**Figure S8** Normalized fluorescent emission spectra of **BTCT** (a,  $\lambda_{\text{ex}} = 430$  nm) and XRD patterns of **BTCT** (b) in different solid-state.

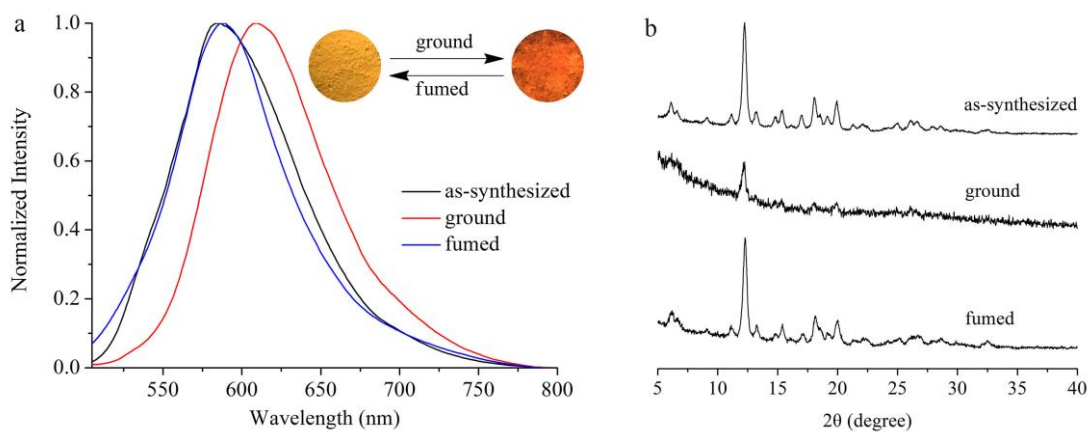

**Figure S9** Normalized fluorescent emission spectra of **BTCTM** (a,  $\lambda_{\text{ex}} = 430$  nm) and XRD patterns of **BTCTM** (b) in different solid-state.

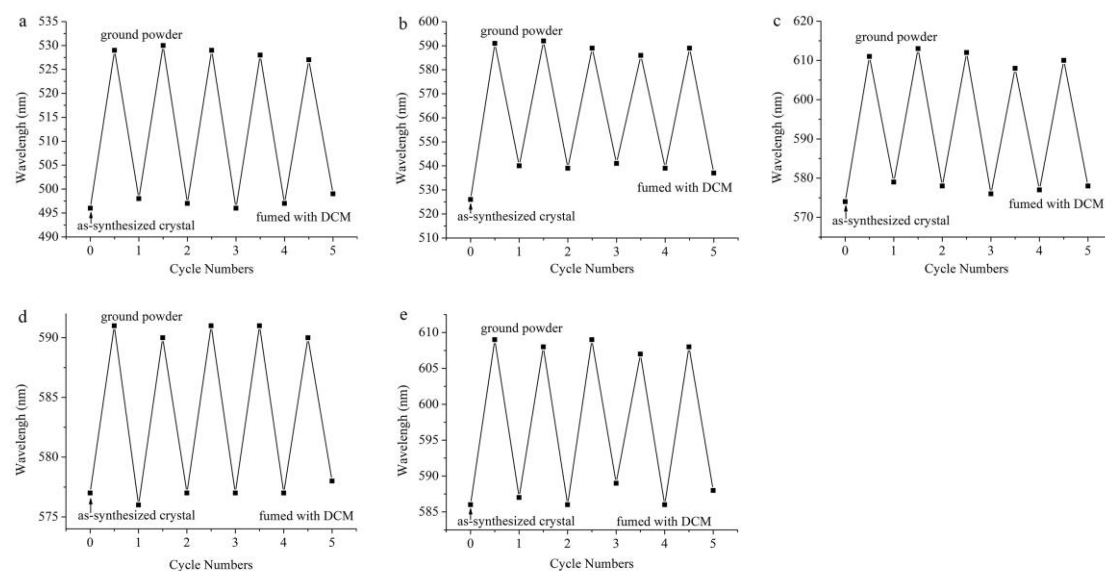

**Figure S10** Maximum fluorescence emission of **BTM** (a), **BICT** (b), **BICTM** (c), **BTCT** (d), **BTCTM** (e) upon the treatment of grinding/fuming with DCM repeatedly.

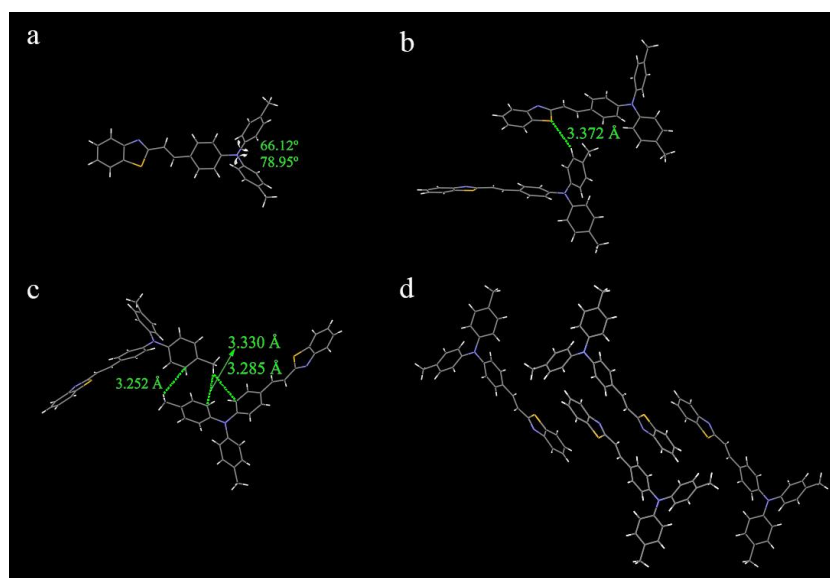

**Figure S11** The molecular conformation of **BTM** in single crystal (a); the intermolecular interactions in single crystal of **BTM** (b, c) and single crystal structure of **BTM** viewed along c-axis (d).

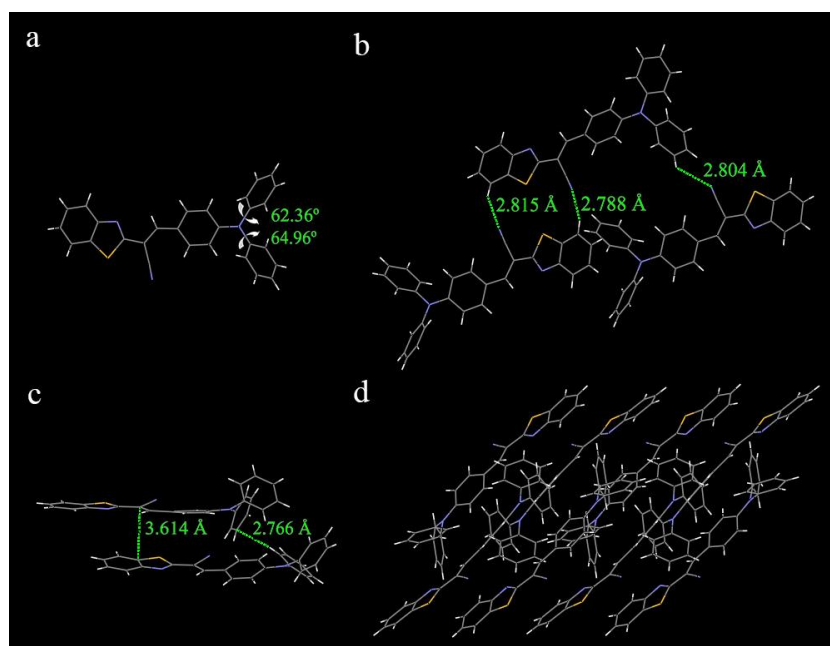

**Figure S12** The molecular conformation of **BTCT** in single crystal (a); the intermolecular interactions in single crystal of **BTCT** (b, c) and single crystal structure of **BTCT** viewed along b-axis (d).

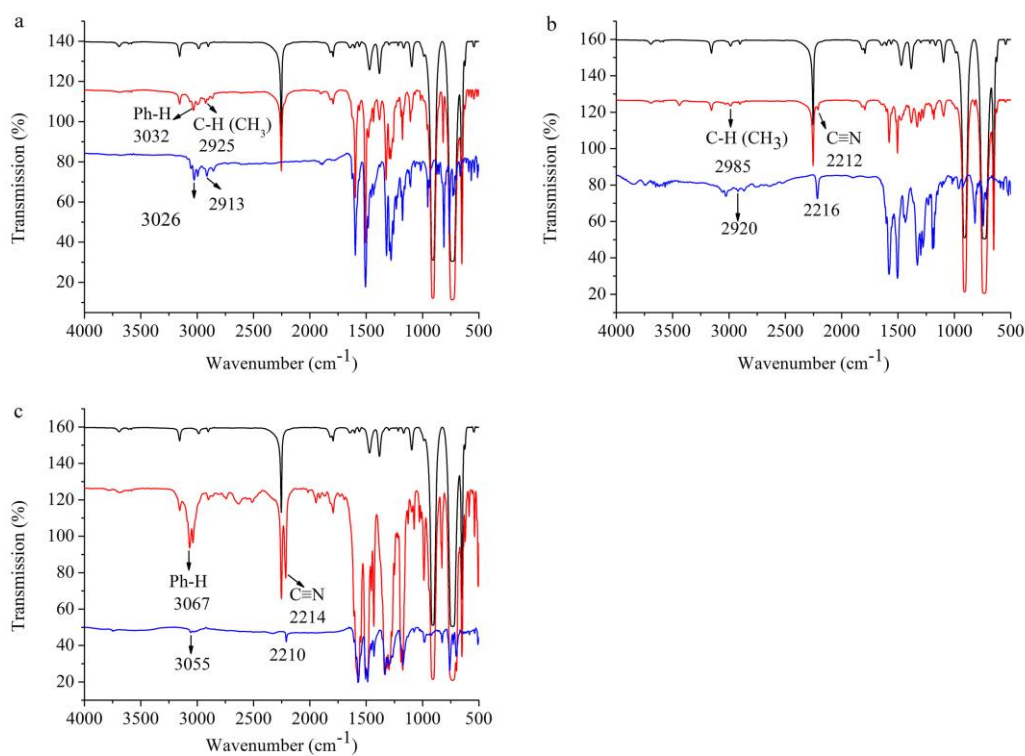

**Figure S13** FT-IR spectra of **BTM** (a), **BICTM** (b) and **BTCT** (c) in CDCl<sub>3</sub> (red) and in crystals (blue); FT-IR spectra of CDCl<sub>3</sub> containing TMS (black).

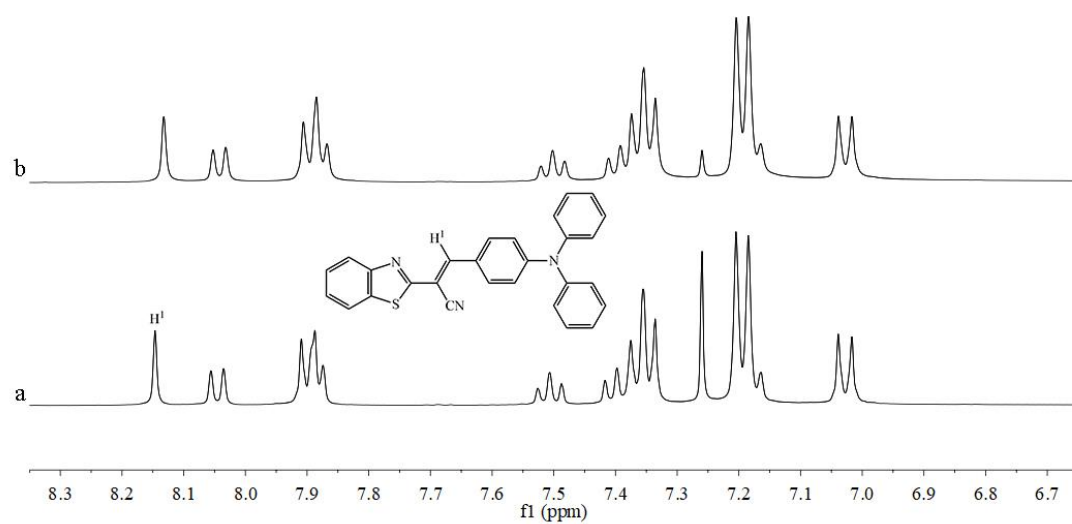

**Figure S14**  $^1\text{H}$  NMR (400 MHz) spectrum of **BTCT** in  $\text{CDCl}_3$  (a: 8 mg/mL, b: 33 mg/mL).

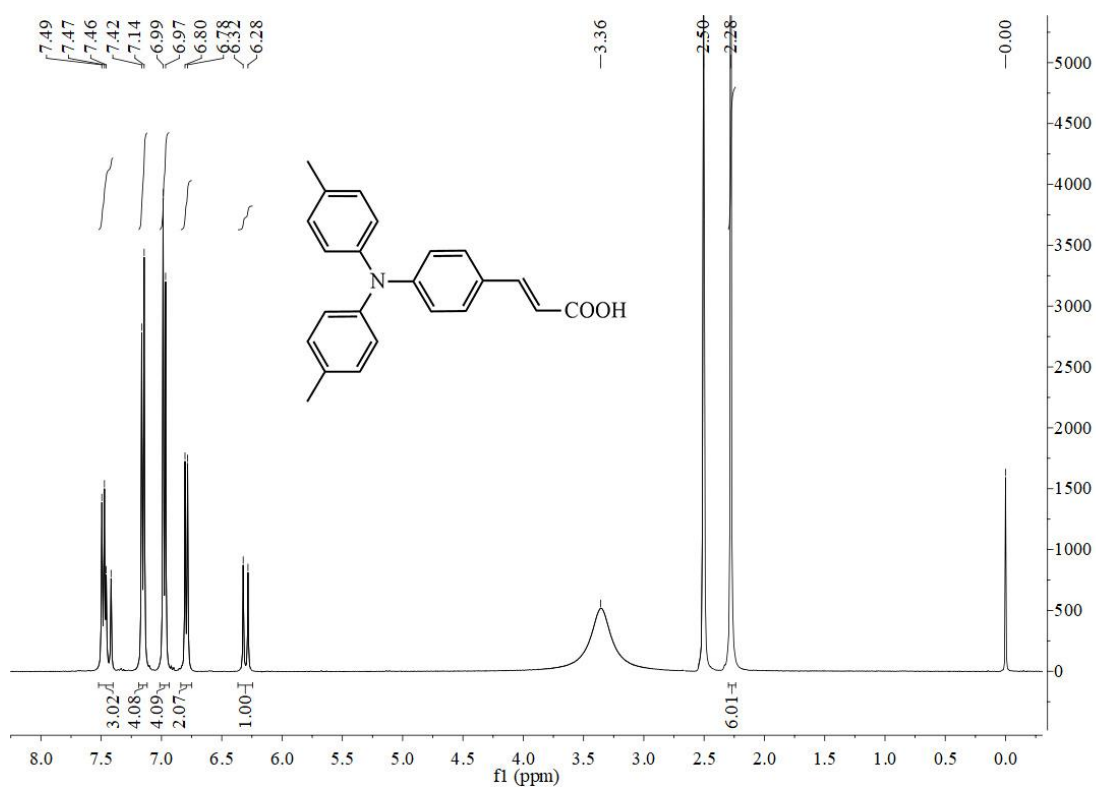

**Figure S15** <sup>1</sup>H NMR (400 MHz) spectrum of *(E)*-3-(4-(dip-tolylamino)phenyl)acrylic acid in DMSO-*d*<sub>6</sub>.

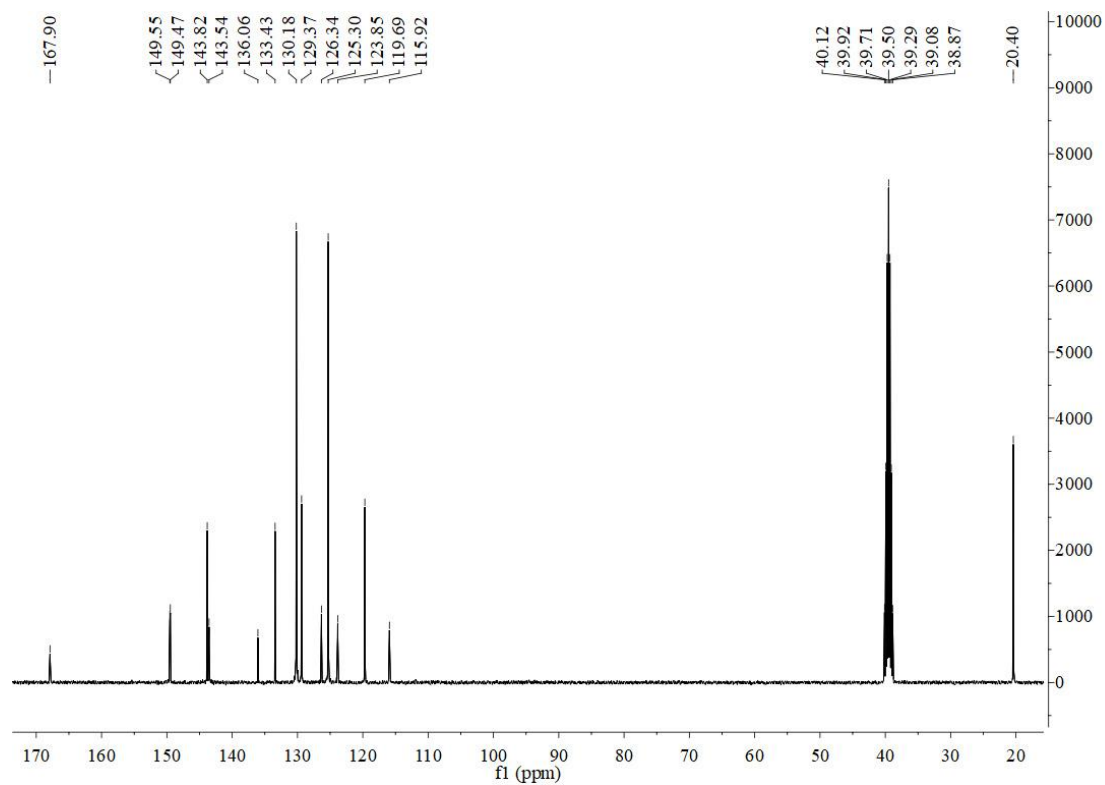

**Figure S16** <sup>13</sup>C NMR (101 MHz) spectrum of *(E)*-3-(4-(dip-tolylamino)phenyl)acrylic acid in DMSO-*d*<sub>6</sub>.

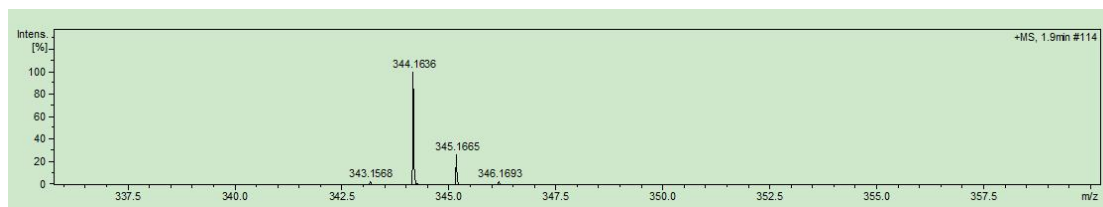

**Figure S17** The HRMS of (*E*)-3-(4-(dip-tolylamino)phenyl)acrylic acid.

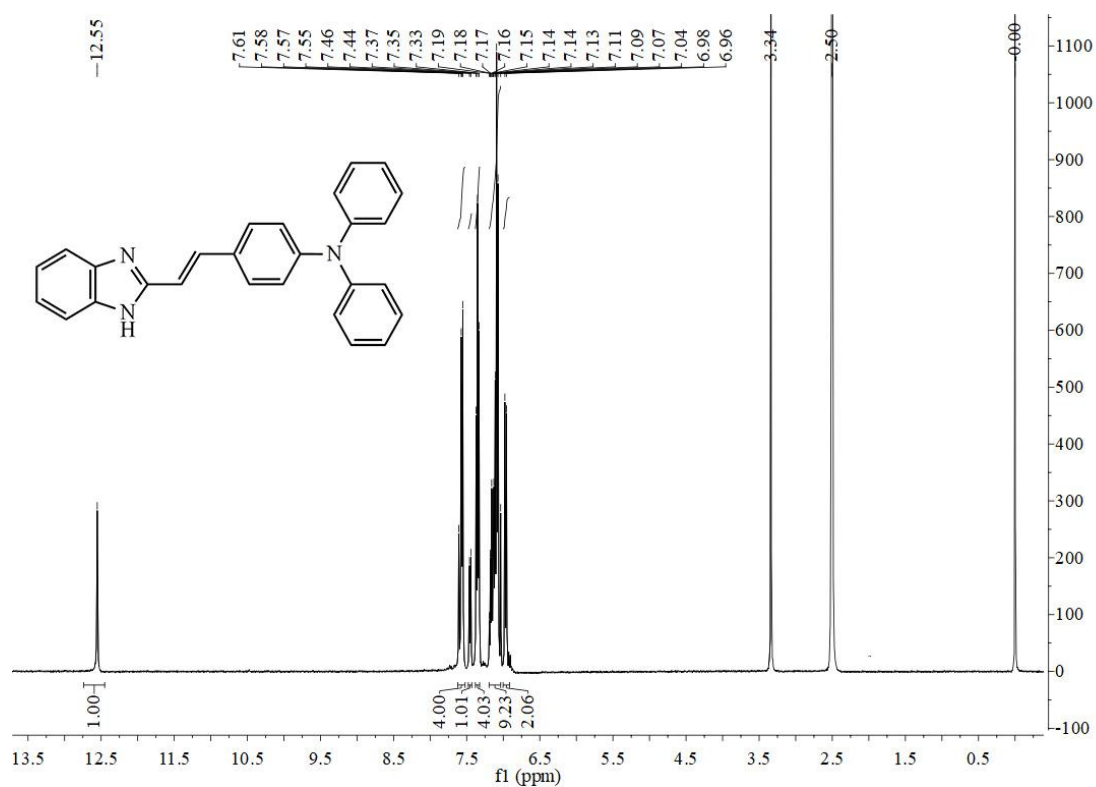

**Figure S18**  $^1\text{H}$  NMR (400 MHz) spectrum of **BIT** in  $\text{DMSO}-d_6$ .

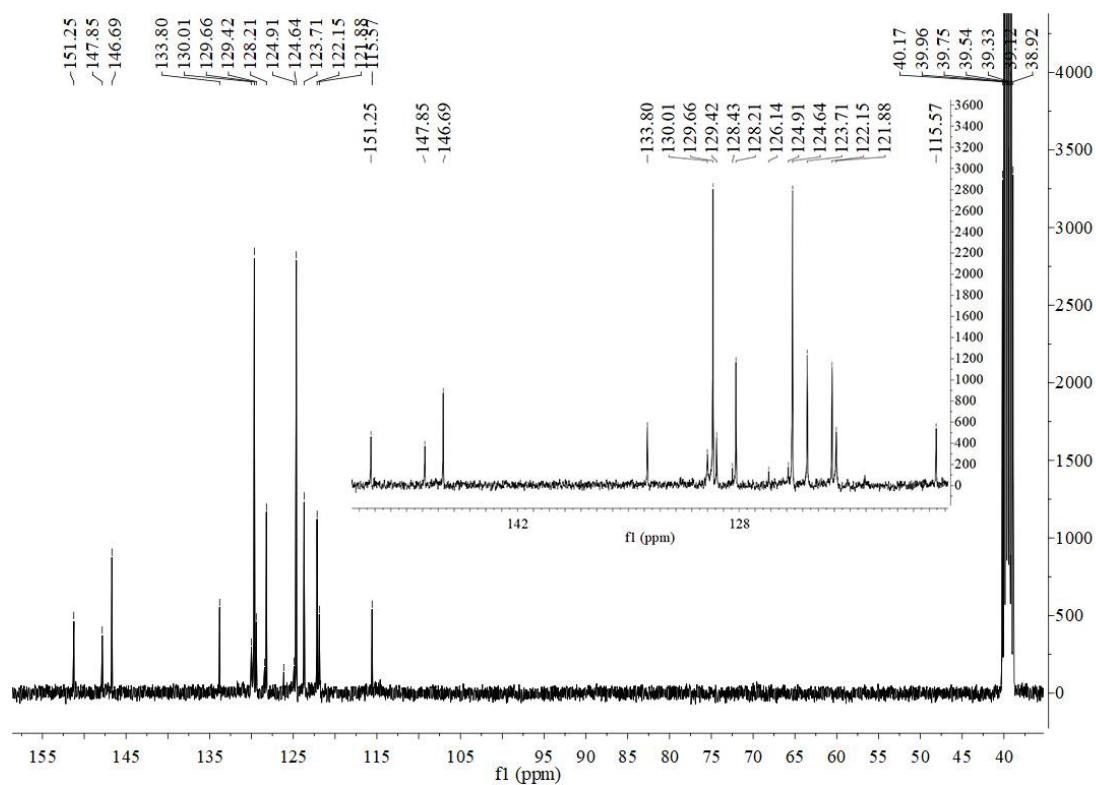

**Figure S19**  $^{13}\text{C}$  NMR (101 MHz) spectrum of **BIT** in  $\text{DMSO}-d_6$ .

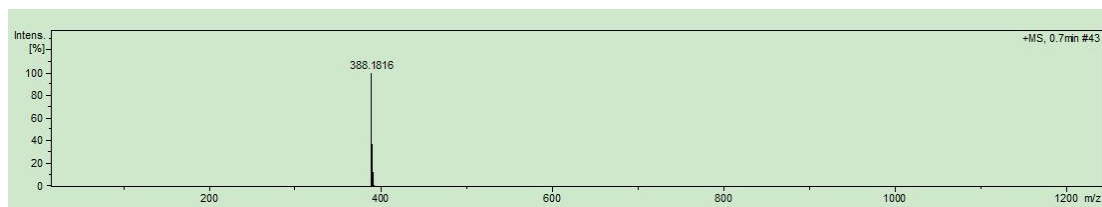

**Figure S20** The HRMS of **BIT**.



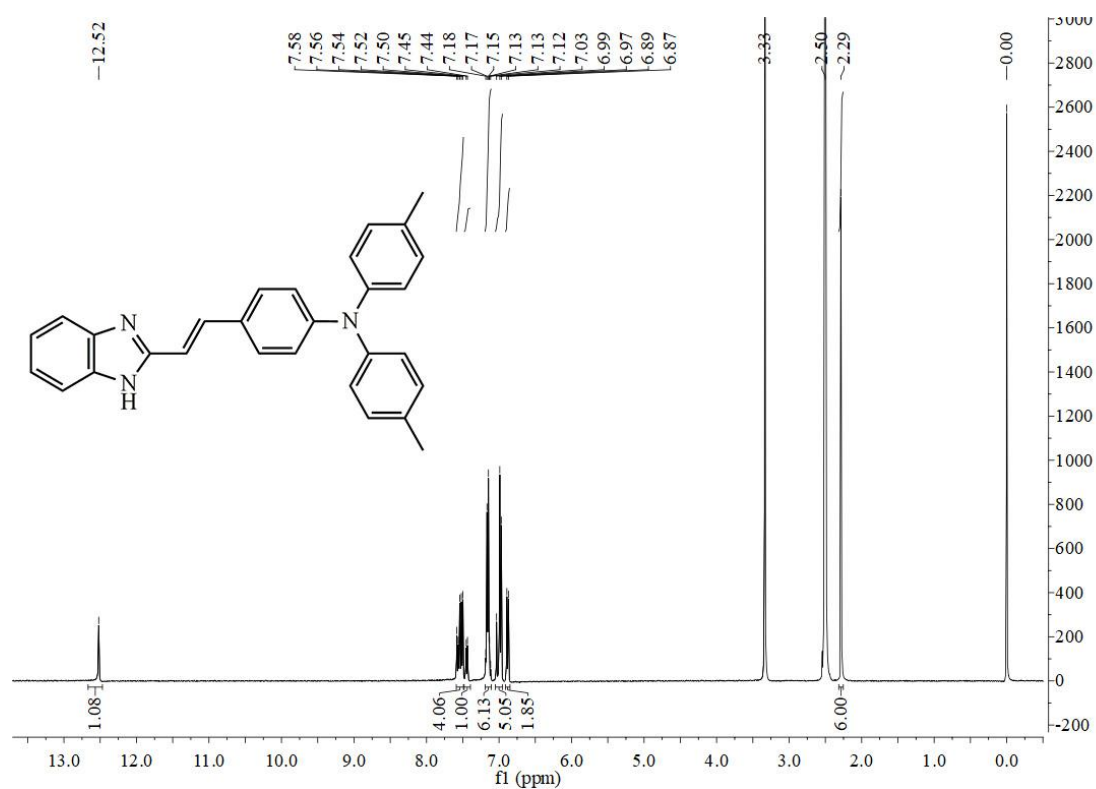

**Figure S21** <sup>1</sup>H NMR (400 MHz) spectrum of **BITM** in DMSO-*d*<sub>6</sub>.

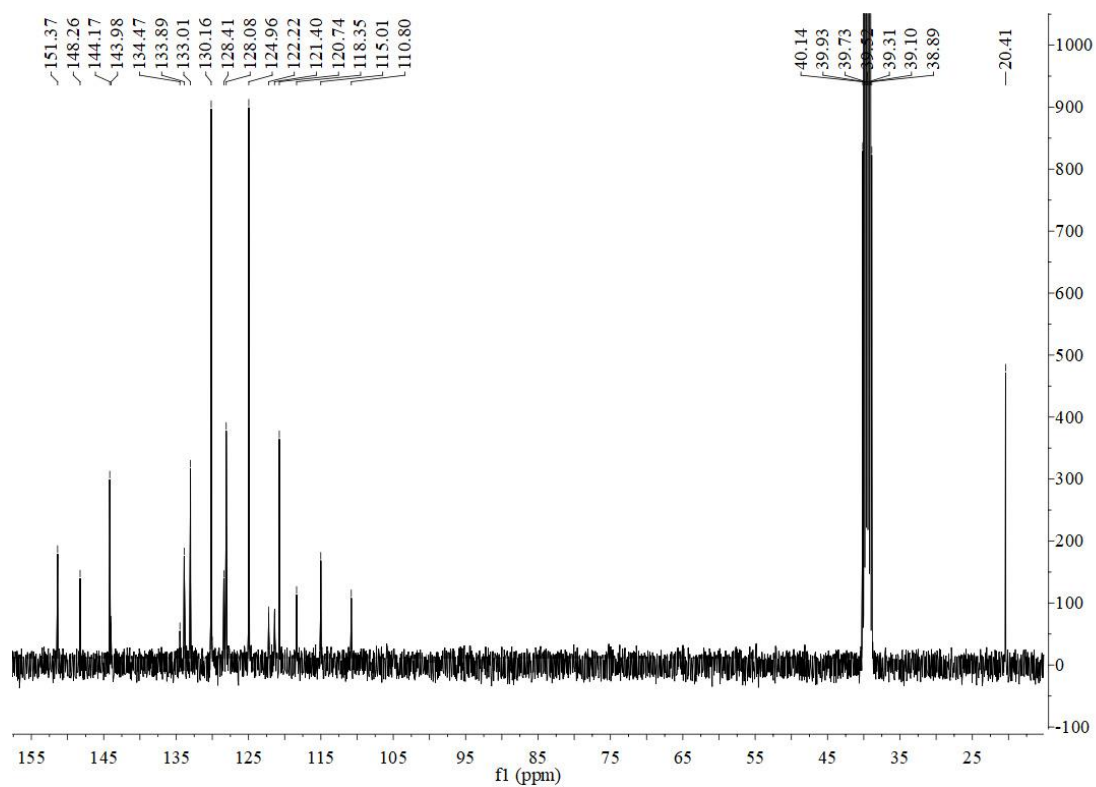

**Figure S22** <sup>13</sup>C NMR (101 MHz) spectrum of **BITM** in DMSO-*d*<sub>6</sub>.

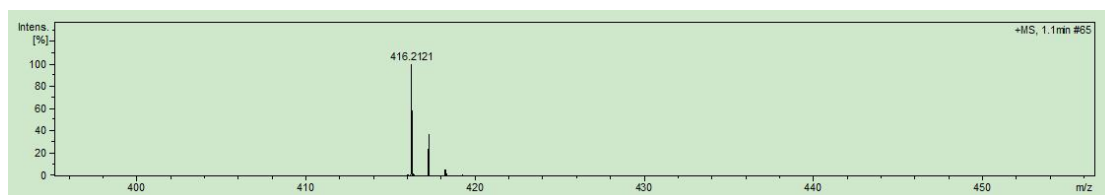

**Figure S23** The HRMS of **BITM**.

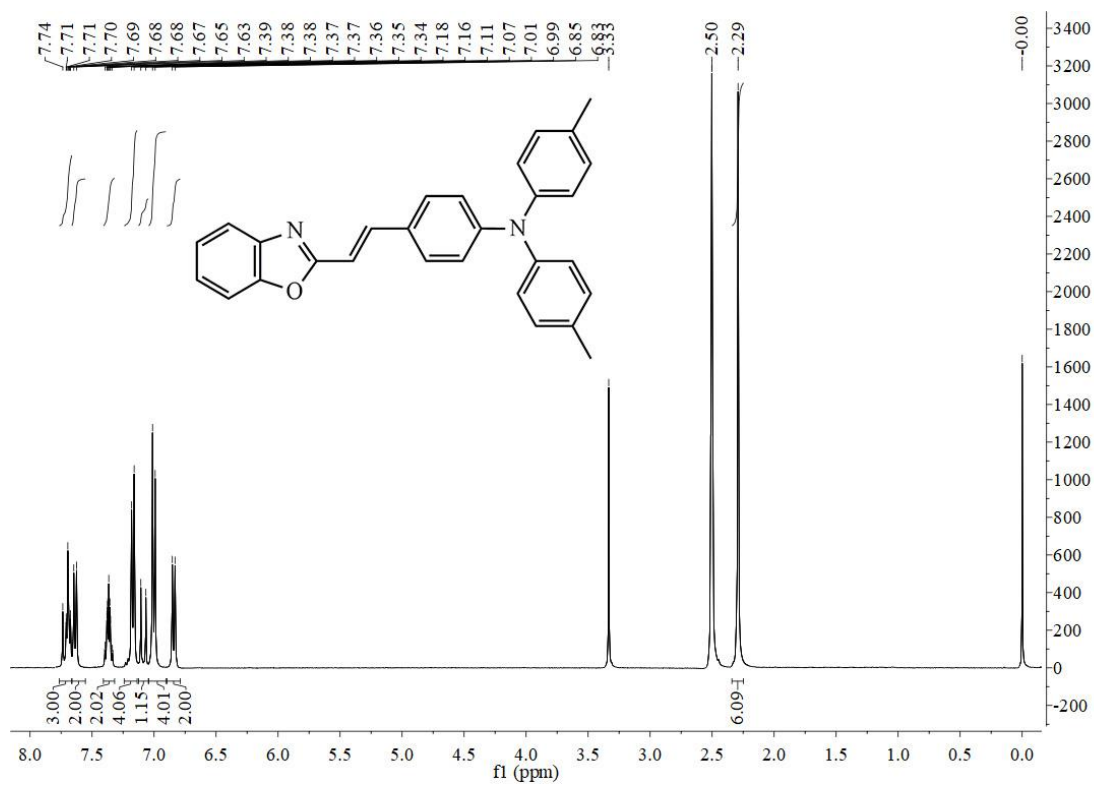

**Figure S24** <sup>1</sup>H NMR (400 MHz) spectrum of **BOTM** in DMSO-*d*<sub>6</sub>.

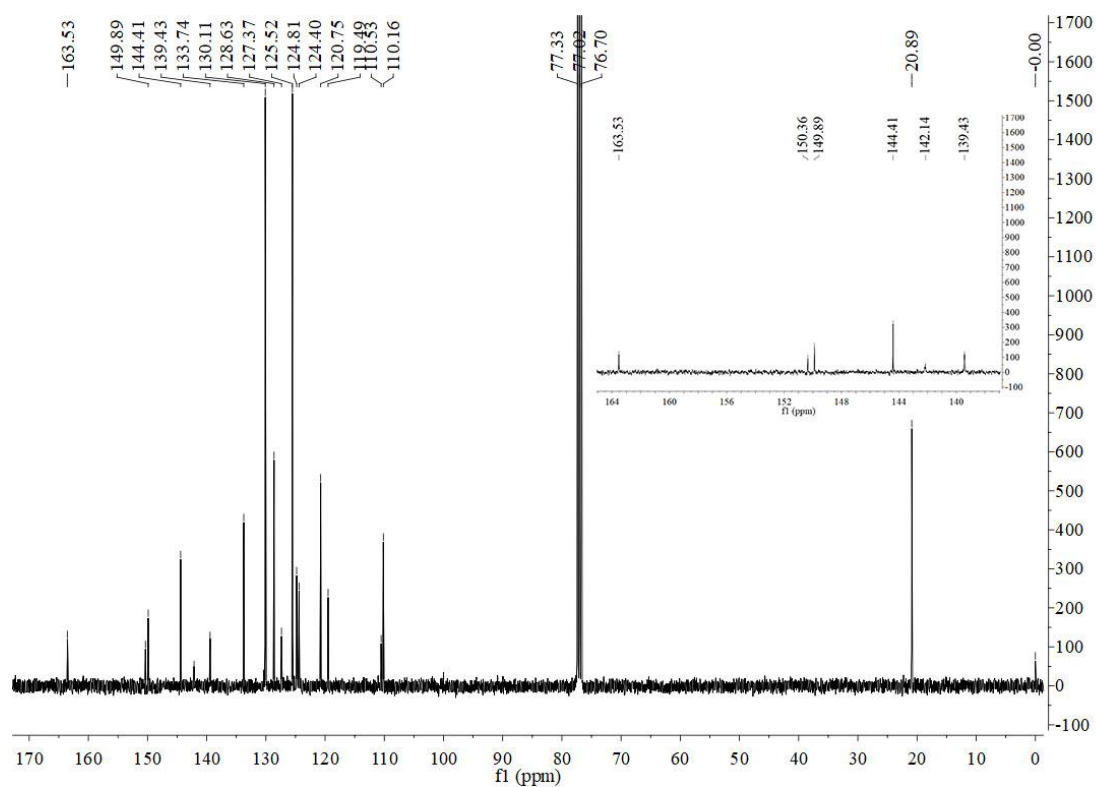

**Figure S25**  $^{13}\text{C}$  NMR (101 MHz) spectrum of **BOTM** in  $\text{CDCl}_3$ .

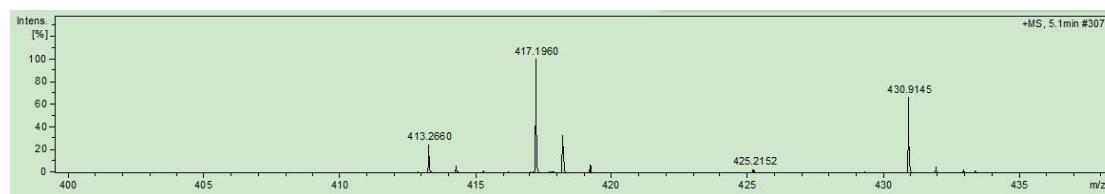

**Figure S26** The HRMS of **BOTM**.

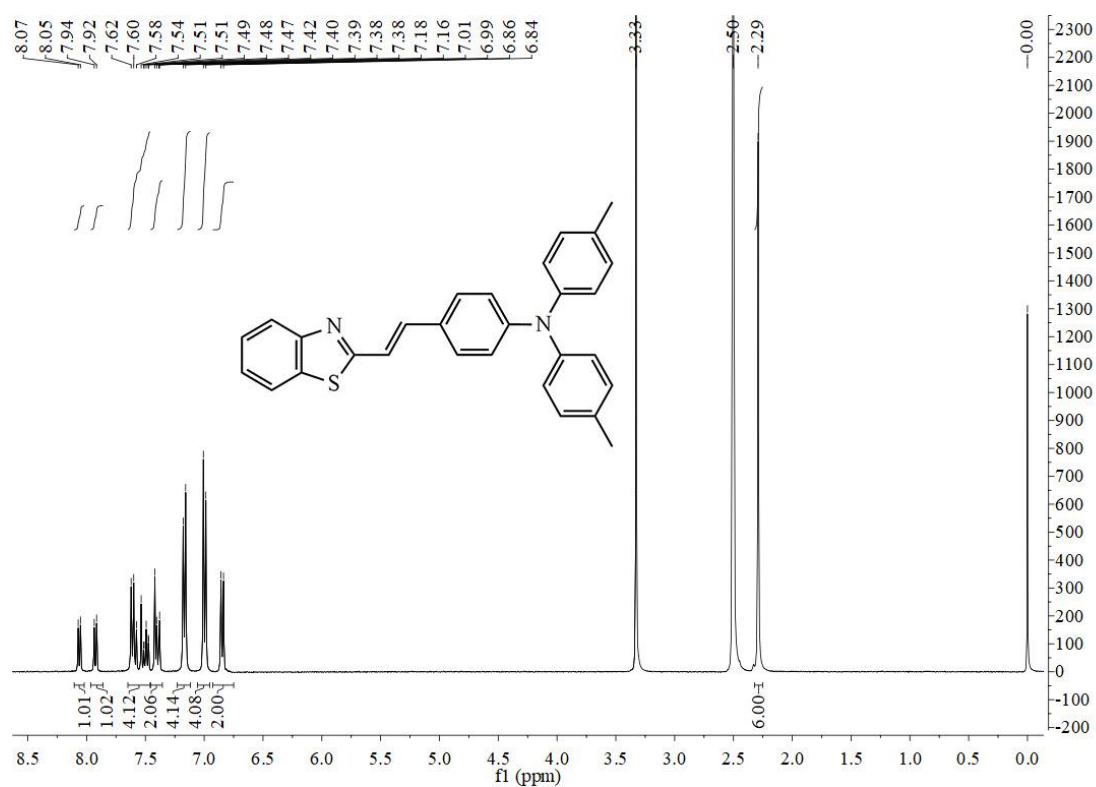

**Figure S27** <sup>1</sup>H NMR (400 MHz) spectrum of **BTM** in DMSO-*d*<sub>6</sub>.

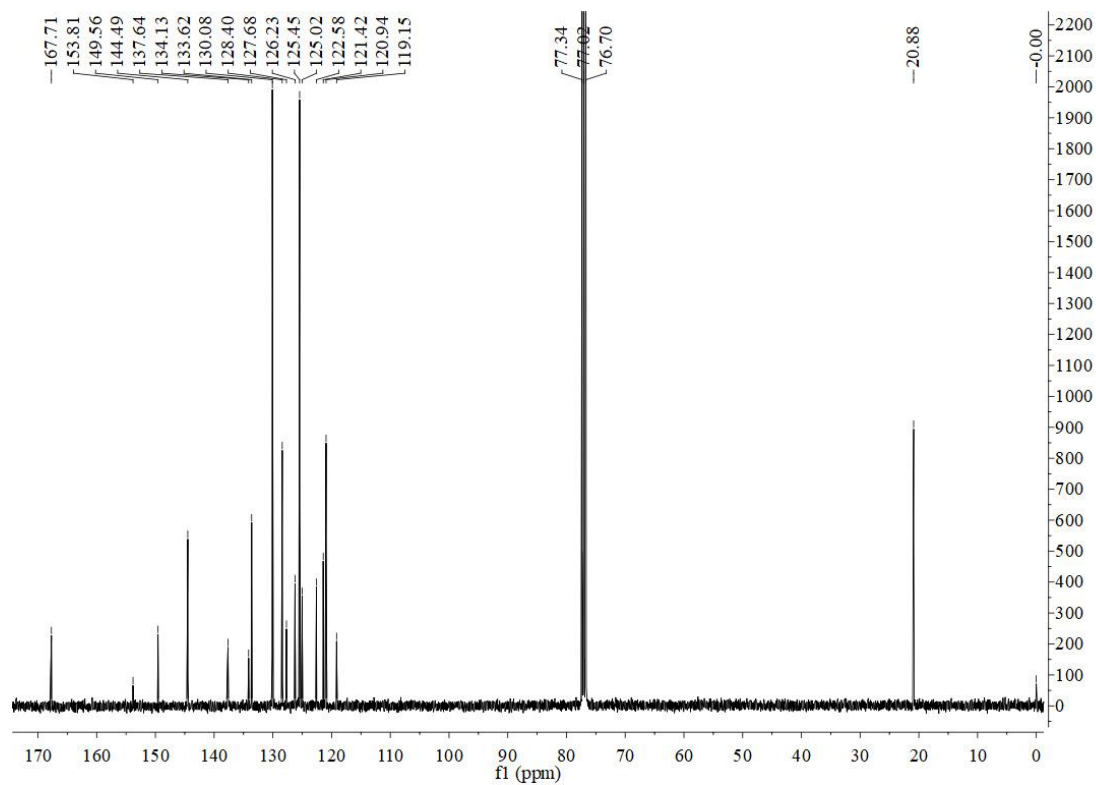

**Figure S28** <sup>13</sup>C NMR (101 MHz) spectrum of **BTM** in CDCl<sub>3</sub>.

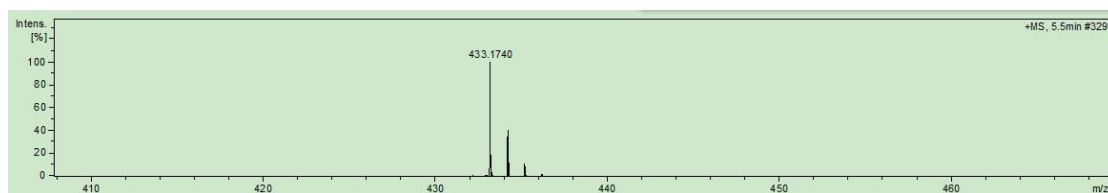

**Figure S29** The HRMS of **BTM**.

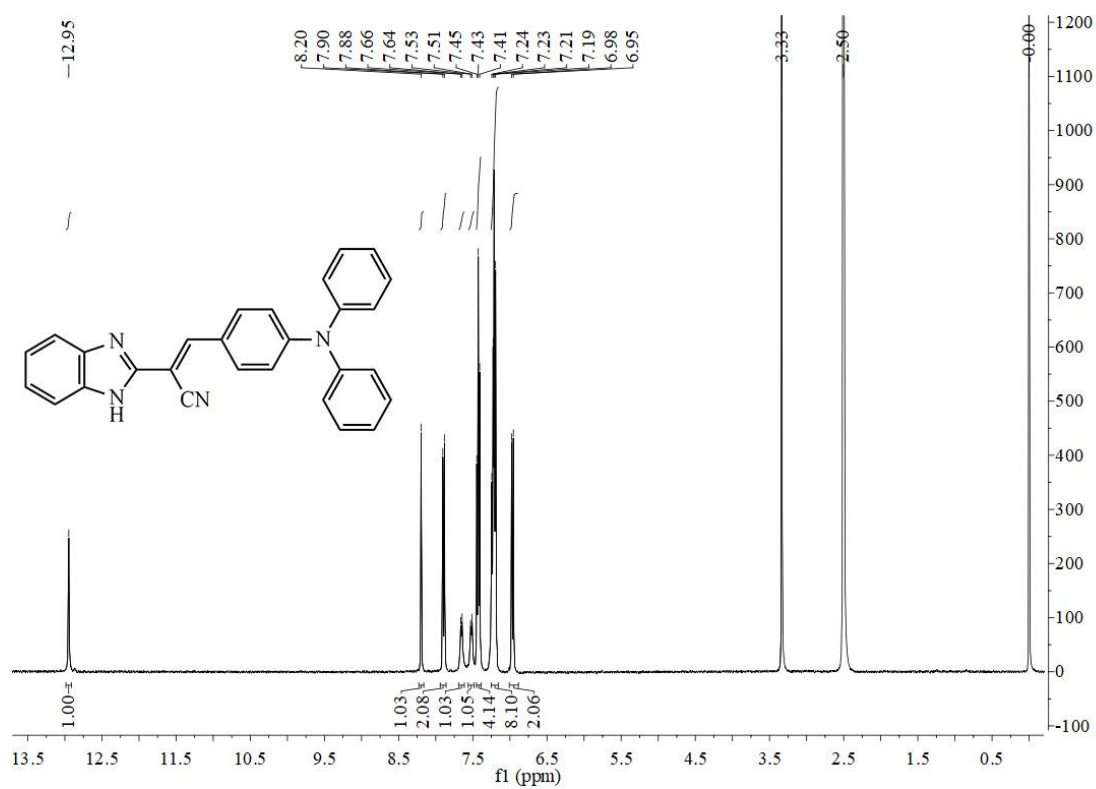

**Figure S30** <sup>1</sup>H NMR (400 MHz) spectrum of **BICT** in DMSO-*d*<sub>6</sub>.

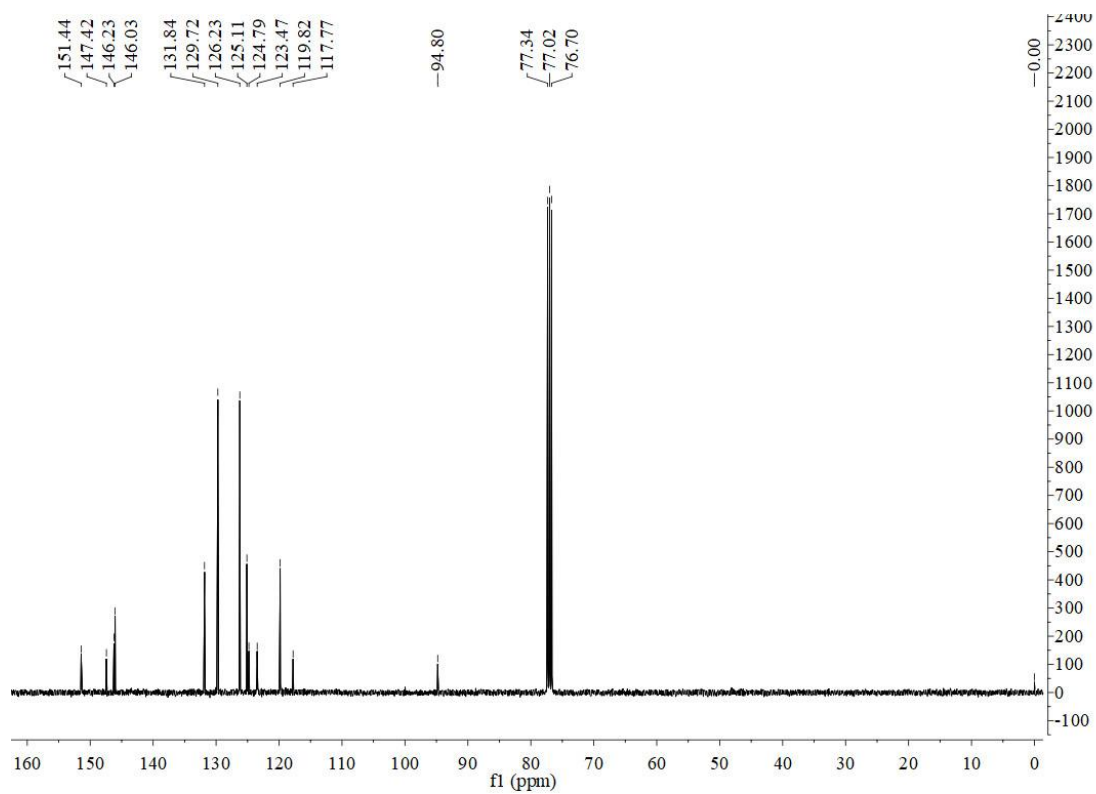

**Figure S31** <sup>13</sup>C NMR (101 MHz) spectrum of **BICT** in CDCl<sub>3</sub>.

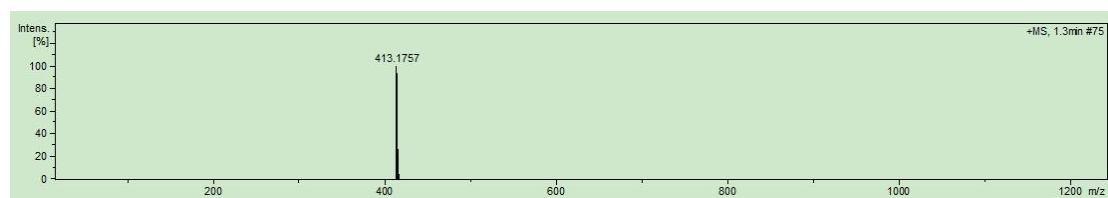

**Figure S32** The HRMS of **BICT**.

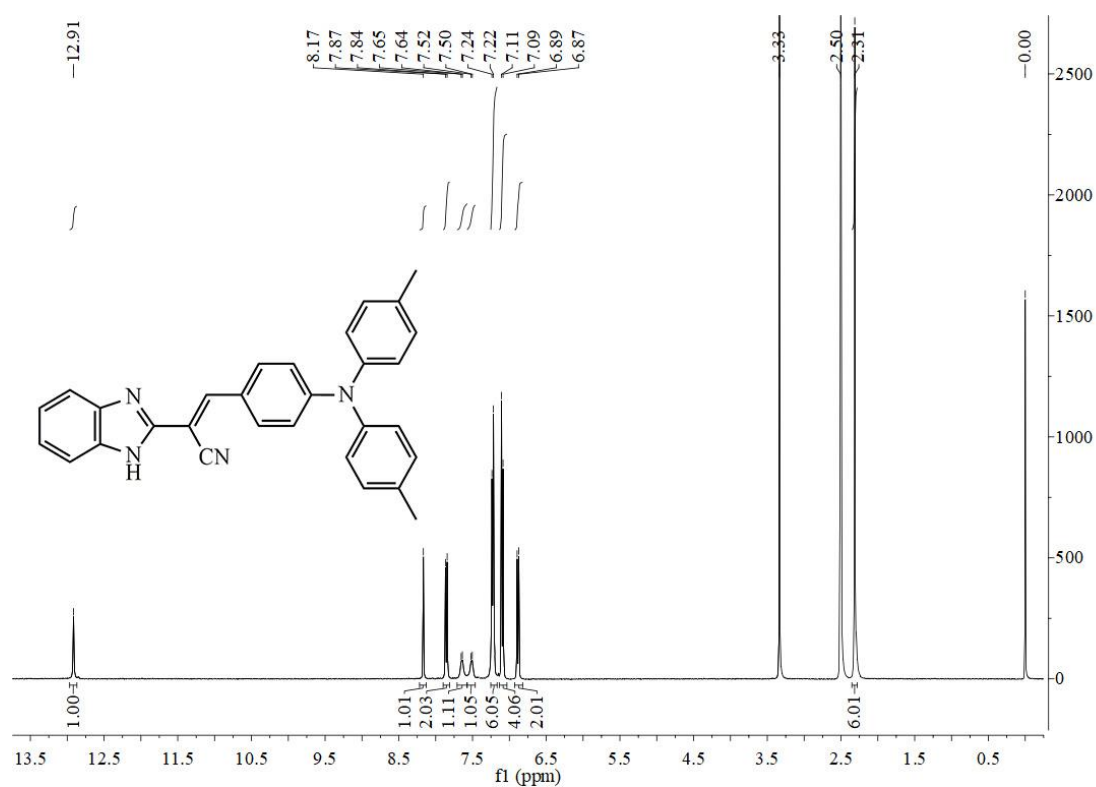

**Figure S33** <sup>1</sup>H NMR (400 MHz) spectrum of **BICTM** in DMSO-*d*<sub>6</sub>.

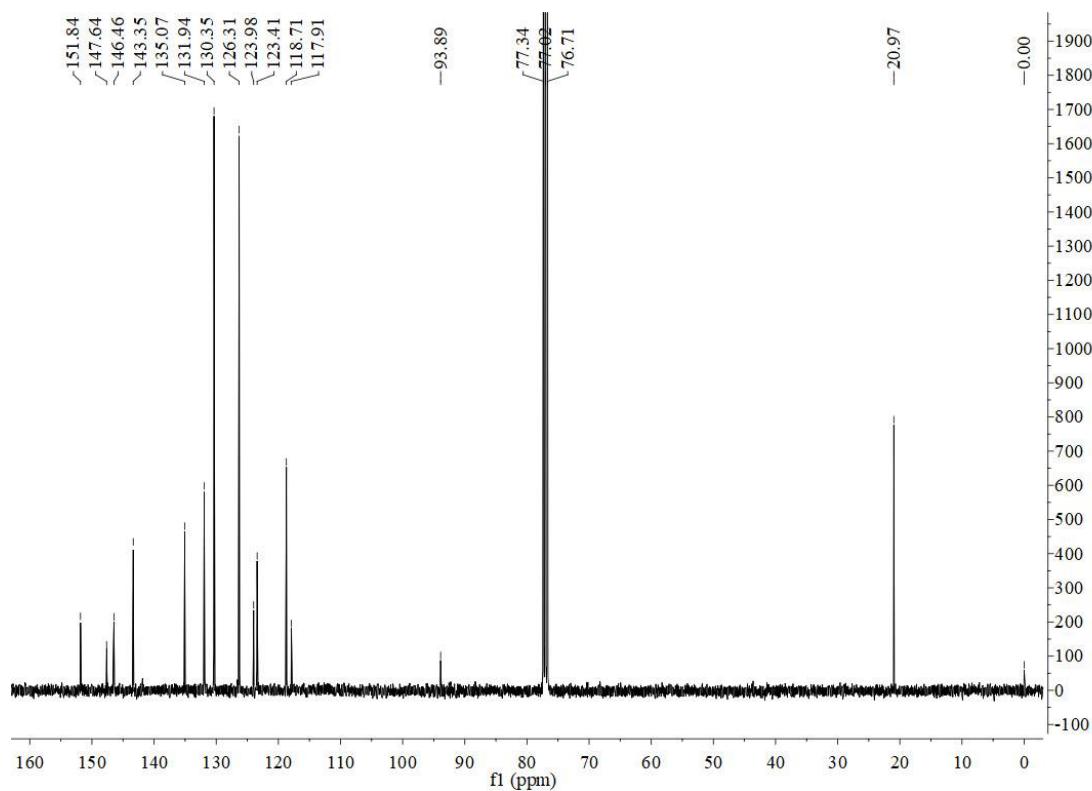

**Figure S34** <sup>13</sup>C NMR (101 MHz) spectrum of **BICTM** in CDCl<sub>3</sub>.



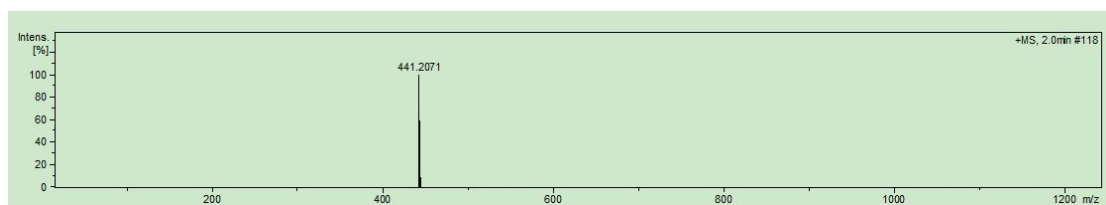

**Figure S35** The HRMS of **BICTM**.

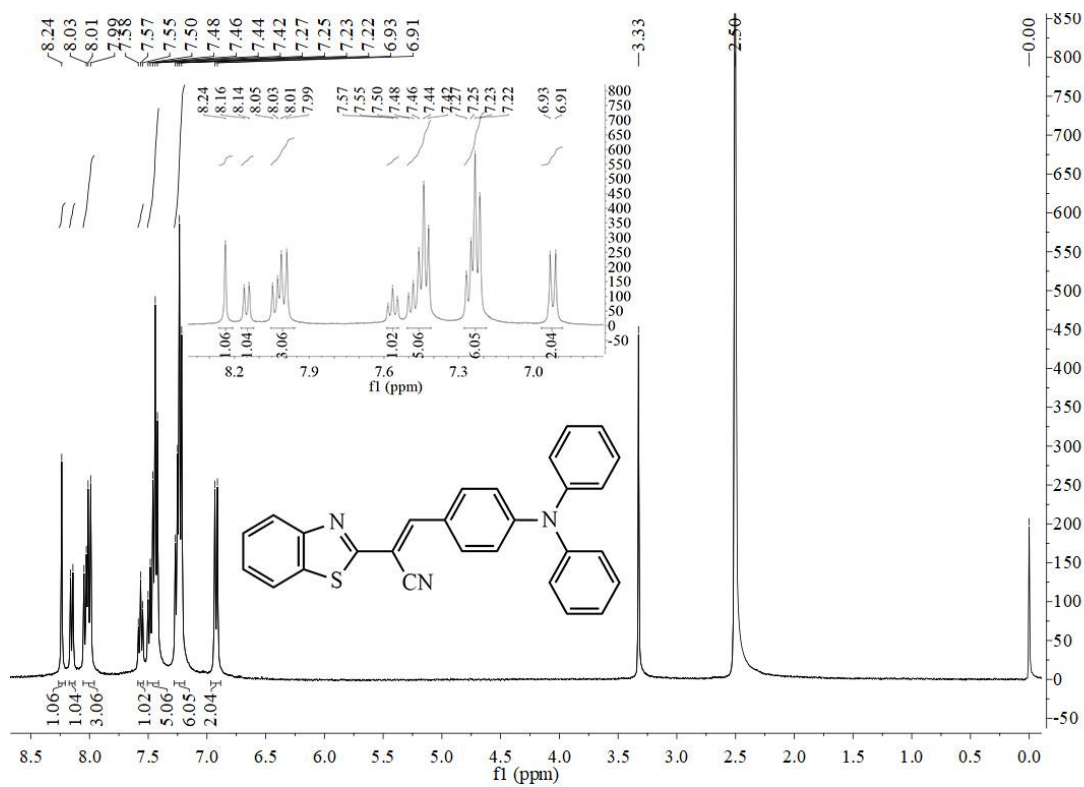

**Figure S36** <sup>1</sup>H NMR (400 MHz) spectrum of **BTCT** in DMSO-*d*<sub>6</sub>.

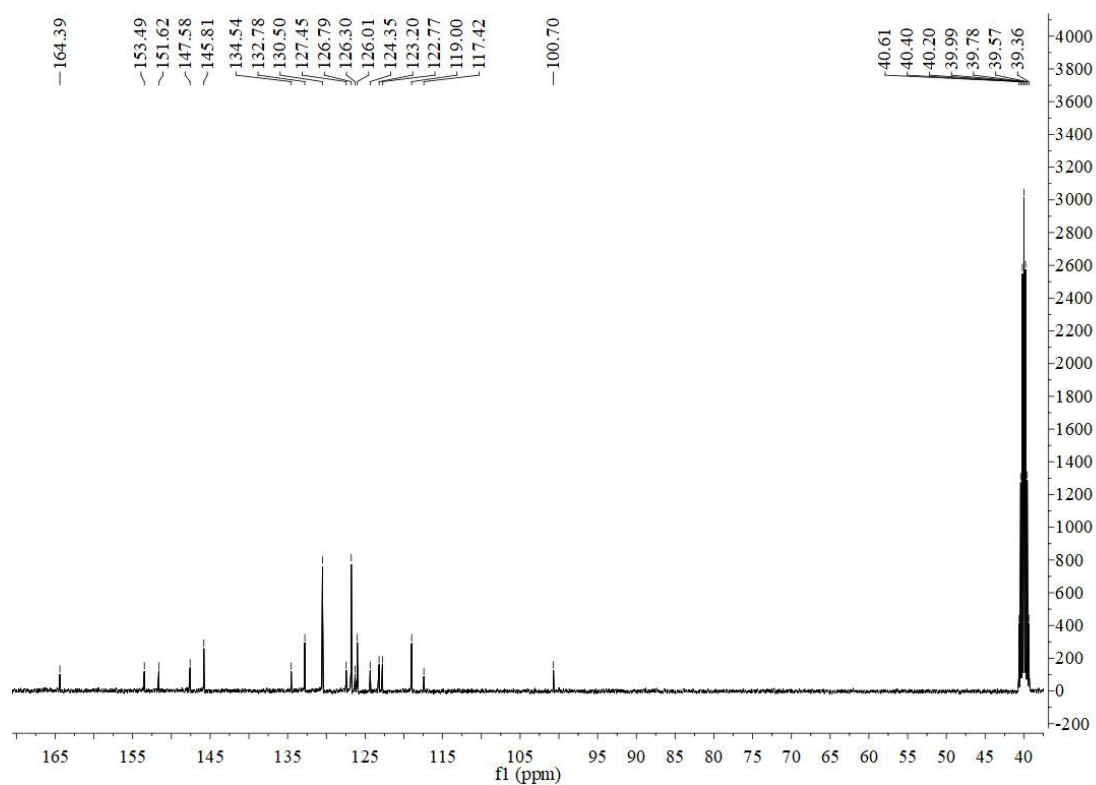

**Figure S37**  $^{13}\text{C}$  NMR (101 MHz) spectrum of **BTCT** in  $\text{DMSO-d}_6$ .

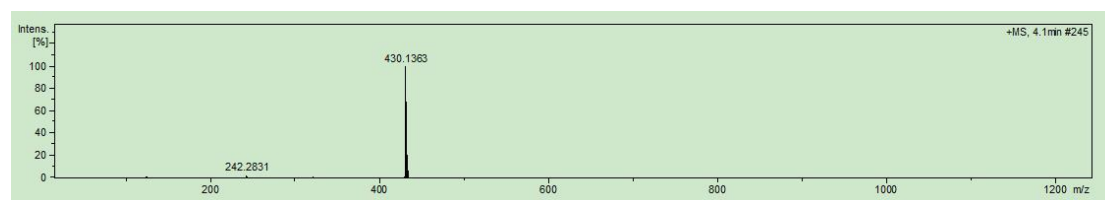

**Figure S38** The HRMS of **BTCT**.

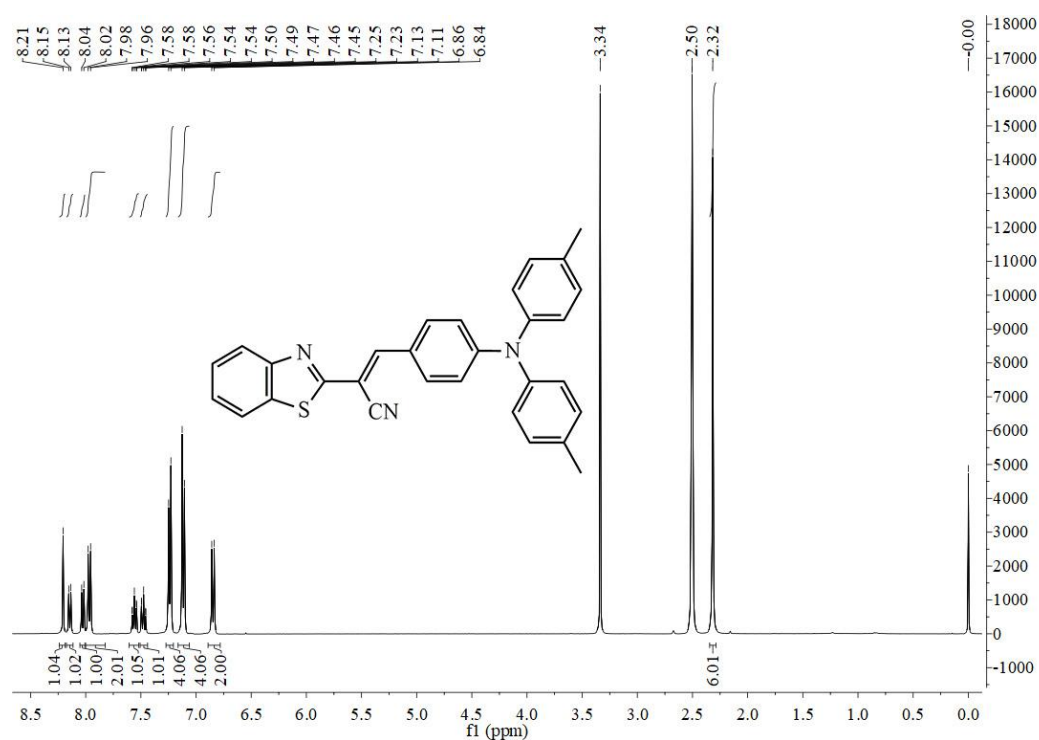

**Figure S39**  $^1\text{H}$  NMR (400 MHz) spectrum of **BTCTM** in  $\text{DMSO}-d_6$ .

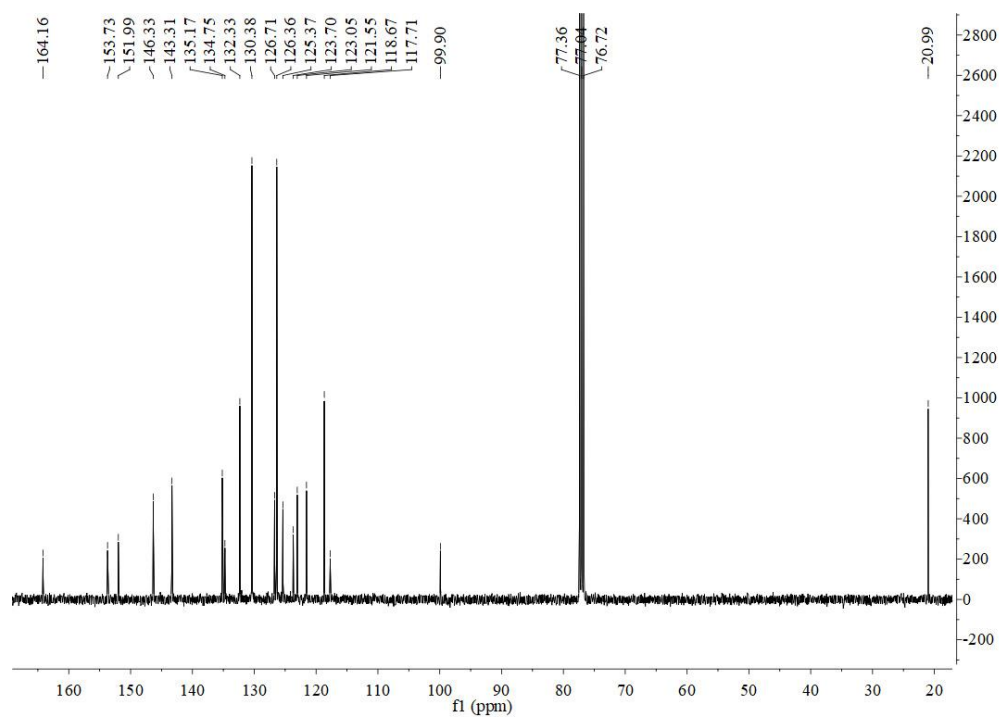

**Figure S40**  $^{13}\text{C}$  NMR (101 MHz) spectrum of **BTCTM** in  $\text{CDCl}_3$ .

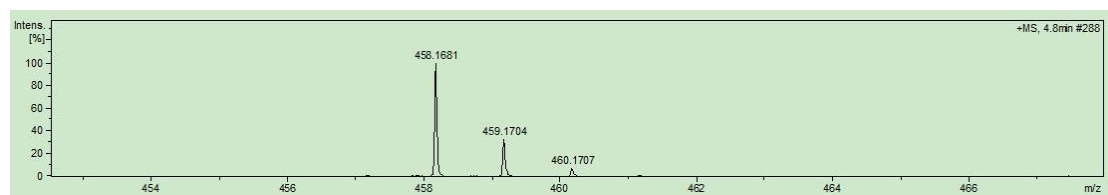

**Figure S41** The HRMS of **BTCTM**.
